# Supplementary material for: A nanocomposite approach to develop biodegradable thermogels exhibiting excellent cell-compatibility for injectable cell delivery
Source: Royal Society of Chemistry journal article supplement (doi:10.1039/c4bm00074a), 2014-01-01
Supplement: c4bm00074a1.pdf [file c4bm00074a1.pdf]

Additional data for Reviewers

## A nanocomposite approach to develop biodegradable thermogels exhibiting excellent cell-compatibility for injectable cell delivery

Naho Oyama, Hiromasa Minami, Daichi Kawano, Makoto Miyazaki, Tomoki Maeda, Kazunori Toma, Atsushi Hotta, and Koji Nagahama\*

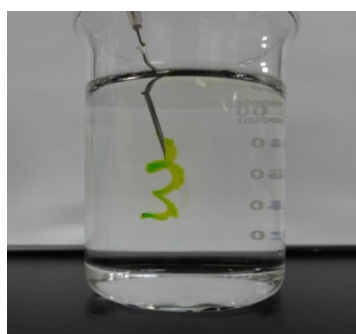

**Figure R1.** Photographs of thermo-gelation for P<sub>3k</sub>3L0.9 solution in PBS (pH 7.4, 140 mM) at 37 °C.

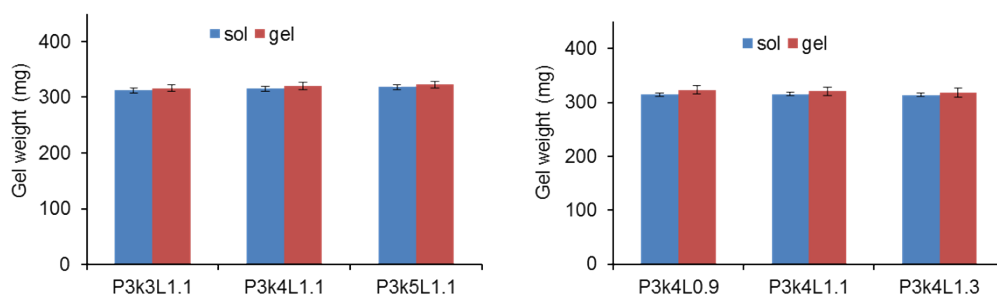

**Figure R2.** Weight of P<sub>3k</sub>/LP solutions and the thermogels as prepared in PBS (pH 7.4, 140 mM) at 37 °C.

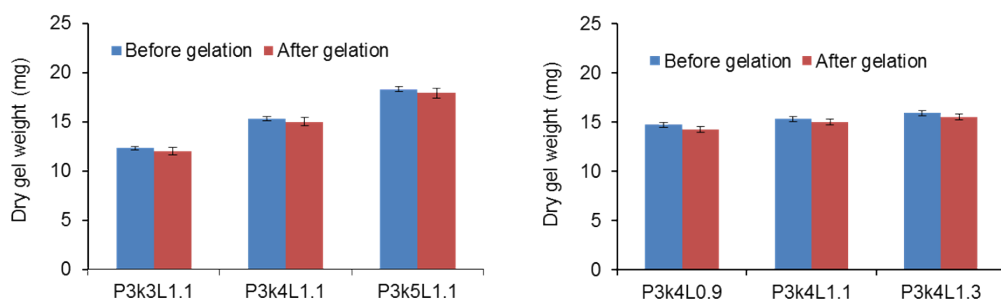

**Figure R3.** Weight of lyophilized P<sub>3k</sub>/LP thermogels prepared in PBS (pH 7.4, 140 mM) at 37 °C and the corresponding weight of P<sub>3k</sub> and LP.

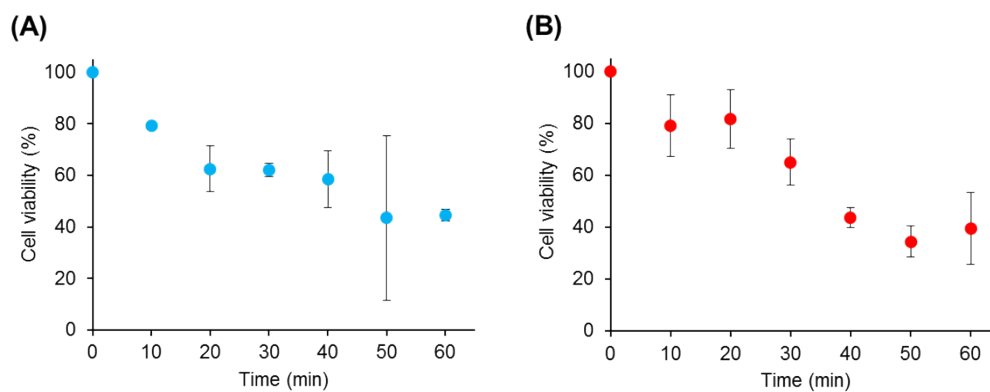

**Figure R4.** (A) Time course of cell viability of L929 cells immersion in 20 wt%  $P_{1.5k}$  solution in PBS (pH 7.4, 140 mM) at 37 °C. (B) Time course of cell viability of L929 cells encapsulated in 20 wt%  $P_{1.5k}$  gel prepared using PBS (pH 7.4, 140 mM) at 37 °C. 20 wt%  $P_{1.5k}$  solution in PBS (pH 7.4, 140 mM) formed thermogels within 5 minutes at 37 °C.
